# Supplementary material for: Behavioral weather insurance: Applying cumulative prospect theory to agricultural insurance design under narrow framing
Source: PLoS One. 2020 May 1;15(5):e0232267. doi: 10.1371/journal.pone.0232267 (PMC7194365; doi:10.1371/journal.pone.0232267)
Supplement: S5 Table — (DOCX) [file pone.0232267.s009.docx]

Table S5. Wilcoxon signed rank test results for differences in the prospect value using CPT specifications *Boc.1*, *Boc.2* *Boc.3* and *Bab* (H4 – H8) – sensitivity analysis two-year contract

|  | BWI with all Adjustments fulfilled | BWI excluding Adjustment 1  (small losses not insured) |
| --- | --- | --- |
| **Specifications** | **p-valuea,b**  H0:  H1: > | |
| *H4: Boc.1* | 0.99 | 1.22 10-4 |
| *H5: Boc.2* | 0.99 | 1.83 10-3 |
| *H6: Boc.3* | 1 | 1.22 10-4 |
| *H7: Bou* | 1 | 0.14 |
| *H8: Bab* | 1 | 6.10 10-5 |

a Low p-values imply a rejection of the null hypotheses stated in H4-H8

b Bonferroni corrected p-values
